# Supplementary material for: Investigating Activity Recognition for Hemiparetic Stroke Patients Using Wearable Sensors: A Deep Learning Approach with Data Augmentation
Source: MDPI journal article supplement (doi:10.3390/s24010210), 2023-12-29

Table S1. The label names and descriptions for the movements in the ROM task

| Type                   | Label name    | Description                                                                                                               |
|------------------------|---------------|---------------------------------------------------------------------------------------------------------------------------|
| <b>UNI<sup>b</sup></b> | ShFlex90      | Shoulder flexion to 90 degrees <sup>a</sup>                                                                               |
|                        | ShExt         | Shoulder extension                                                                                                        |
|                        | ShRot         | Shoulder internal and external rotation                                                                                   |
|                        | ShAbd90       | Shoulder abduction to 90 degrees                                                                                          |
|                        | ShHorAdd      | Shoulder horizontal adduction                                                                                             |
|                        | ElbFlex       | Elbow flexion                                                                                                             |
|                        | SupPro        | Forearm supination and pronation                                                                                          |
|                        | FrontSupPro   | Forearm supination and pronation with the arm positioned in front of the body                                             |
|                        | WrstFlex      | Wrist flexion                                                                                                             |
|                        | WrstExt       | Wrist extension                                                                                                           |
|                        | FrontWrstFlex | Wrist flexion with the arm positioned in front of the body                                                                |
|                        | FrontWrstExt  | Wrist extension with the arm positioned in front of the body                                                              |
|                        | Pickup        | Pick up a cup with a handle                                                                                               |
|                        | Scaption90    | Scaption to 90 degrees (arm is raised at an angle of approximately 45 degrees forward from the frontal plane of the body) |

<sup>a</sup>All items without angle specifications were moved to the participants' maximum range. <sup>b</sup>UNI: unilateral movements

Table S2. The label names and descriptions for the movements in the ADL task

| Type                   | Label name      | Description                                |
|------------------------|-----------------|--------------------------------------------|
| <b>BIA<sup>a</sup></b> | OpenBook        | Take the book and open it                  |
|                        | Writing         | Writing                                    |
|                        | OpenNewspaper   | Open a newspaper                           |
|                        | TakeCard        | Take the business card and close the cover |
|                        | FoldPaper       | Fold a paper                               |
|                        | InsertEnvelope  | Put in envelop                             |
|                        | Knife           | Use a knife                                |
|                        | Scissors        | Use scissors                               |
|                        | OpenCloseLaptop | Open and close a laptop cover              |
|                        | PourWater       | Pour water                                 |
|                        | TakePill        | Open a medicine sachet                     |
|                        | WashDishes      | Wash the dishes                            |

|                        |                   |                                     |
|------------------------|-------------------|-------------------------------------|
|                        | WringDishcloth    | Wring out the dishcloth             |
|                        | PlugOutlet        | Plug in an outlet                   |
|                        | DryHair           | Dry hair                            |
|                        | PutLotion         | Apply lotion after squeezing it out |
|                        | SqueezeToothpaste | Squeeze toothpaste                  |
|                        | WashBody          | Wash the body with a shower puff    |
|                        | Eraser            | Erase                               |
|                        | FoldTowel         | Fold a towel                        |
|                        | ZipUpJacket       | Zip up the jacket                   |
|                        | InsertPhoto       | Open an album and insert photos     |
| <b>BIS<sup>b</sup></b> | LiftBox           | Lift the box up and put it down     |
|                        | PullSitChair      | Pull out the chair and sit down     |
|                        | TypeKeyboard      | Type on a keyboard                  |
|                        | MoveDishes        | Move dishes                         |
|                        | WashHand          | Wash hands                          |
|                        | WashFace          | Wash one's face                     |
|                        | WashHair          | Wash one's hair                     |
|                        | PutLaundry        | Put laundry in and take it out      |
|                        | HangUpLaundry     | Shake out the towel and hang it up  |
|                        | Tissue            | Roll up the tissue                  |
|                        | OpenCloset        | Open and close the closet           |
|                        | WearSocks         | Put on socks and take them off      |
| <b>UNI<sup>c</sup></b> | OpenRefrig        | Open and close refrigerator         |
|                        | PullChairBack     | Pull back the chair                 |
|                        | PressPower        | Press power                         |
|                        | UseMouse          | Use a mouse                         |
|                        | FlipFrontCard     | Flip the business card1             |
|                        | FlipRearCard      | Flip the business card2             |
|                        | StackCoin         | Stack coins                         |
|                        | UseRemote         | Use a remote controller             |
|                        | UseChopsticks     | Use chopsticks                      |
|                        | UseSpoon          | Use a spoon                         |
|                        | DrinkWater        | Drink water                         |
|                        | BrushHair         | Brush one's hair                    |
|                        | TurnOnLight       | Turn on the light                   |

|                   |                                         |
|-------------------|-----------------------------------------|
| TurnOnFaucet      | Turn on/off the faucet                  |
| BrushTeeth        | Brush teeth                             |
| OpenWasher        | Open washer                             |
| PressWasherButton | Press the button on the laundry machine |
| Vacuum            | Vacuum floors                           |
| RinseBody         | Rinse body                              |
| TurnDoorKnob      | Turn a knob                             |
| ArrangeShoes      | Arrange shoes                           |
| LiftDoorlock      | Lift up/down the door lock              |
| PressPIN          | Press the pin number                    |
| OpenDoor          | Open/close the door                     |

<sup>a</sup>BIA: bilateral asymmetric movements, <sup>b</sup>BIS: bilateral symmetric movements, <sup>c</sup>UNI: unimanual movements

Figure S1. F1-score of individual participants. The training group was ND+Stroke with the original data. The mean score was calculated for all the movements. Error bars represent  $\pm$  one standard error.

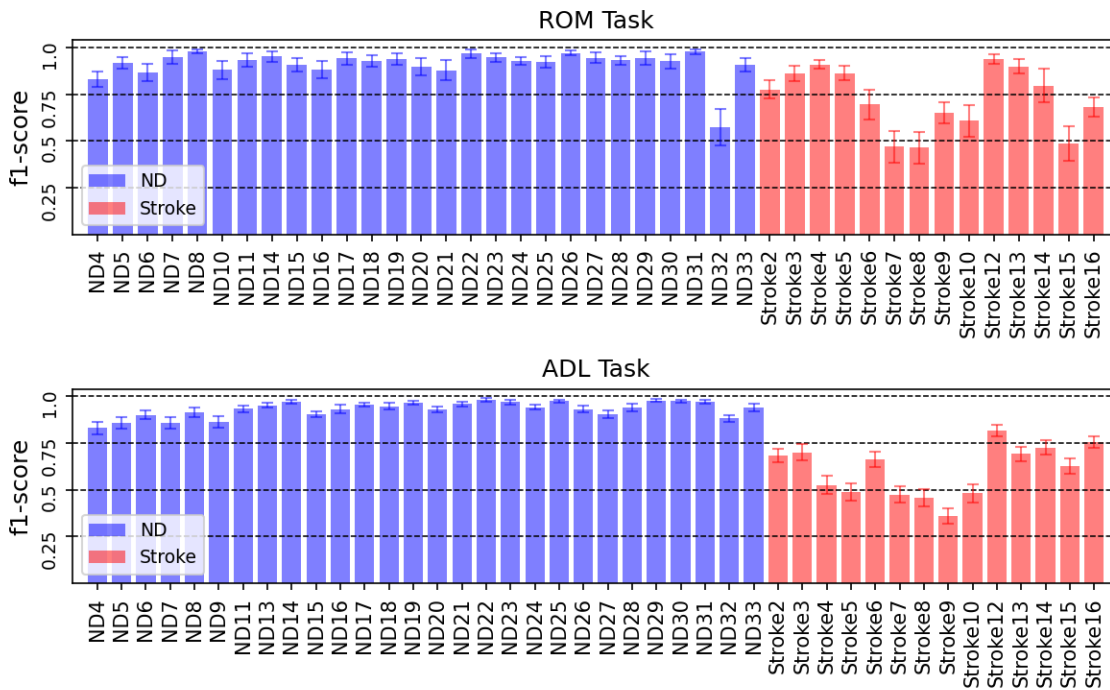

Supplement: s1 [file s1]
